# Supplementary material for: Hydrogen-Oxidizing Bacteria Are Abundant in Desert Soils and Strongly Stimulated by Hydration
Source: PubMed Central journal article supplement (PMC7677003; doi:10.1128/msystems.01131-20), 2020-11-17
Supplement: mSystems.01131-20-sf005.pdf [file mSystems.01131-20-sf005.pdf]

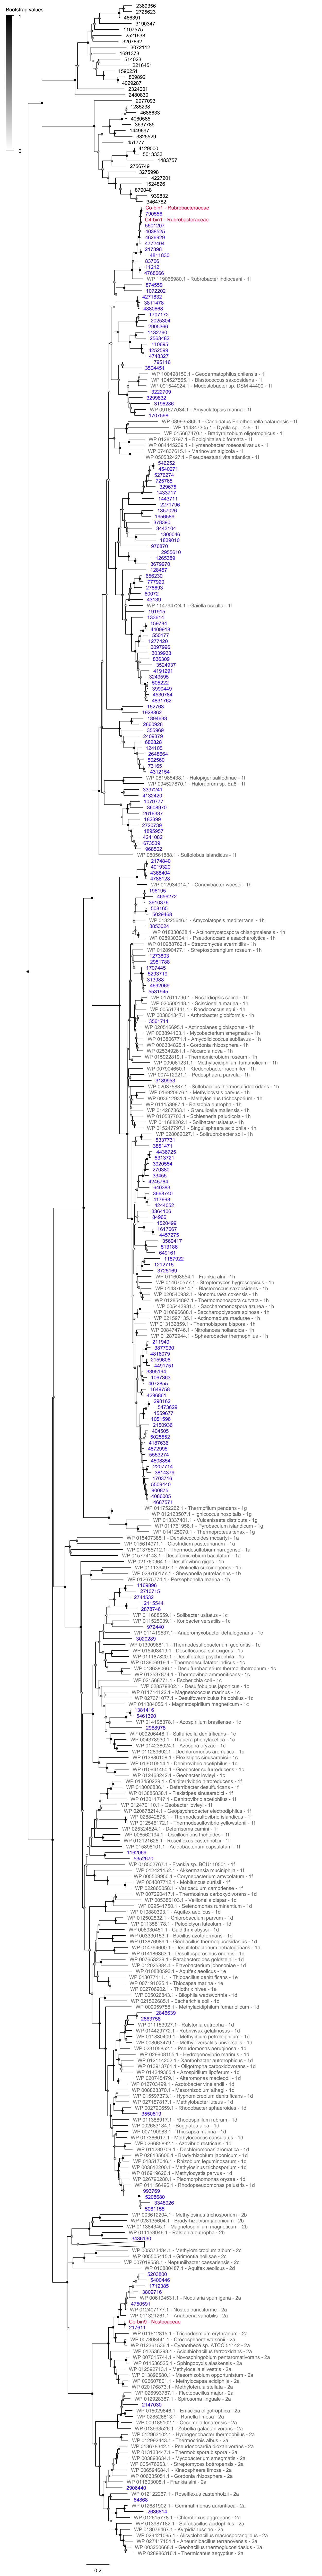

2369356  
2725623  
466391  
3190347  
1107575  
2521638  
3207892  
3072112  
1691373  
514023  
2216451  
1590251  
809892  
4029287  
2324001  
2480830  
2977093  
1285238  
4688633  
4060585  
3637785  
1449697  
3325529  
451777  
4129000  
5013333  
1483757  
2756749  
3275998  
4227201  
1524826  
879048  
939832  
3464782  
**Co-bin1 - Rubrobacteraceae**  
790556  
**C4-bin1 - Rubrobacteraceae**  
5501207  
4038525  
4626929  
4772404  
217398  
4811830  
83706  
11212  
4768666  
WP 119066980.1 - Rubrobacter indioceani - 1l  
874559  
1072202  
4271832  
3811478  
4880668  
1707172  
2025304  
2905366  
1132790  
2563482  
110695  
4252599  
4748327  
795116  
3504451  
WP 100498150.1 - Geodermatophilus chilensis - 1l  
WP 104527565.1 - Blastococcus saxobidensis - 1l  
WP 091544924.1 - Modestobacter sp. DSM 44400 - 1l  
3222709  
3299832  
3196286  
4707598  
WP 089935866.1 - Candidatus Entotheonella palauensis - 1l  
WP 114847305.1 - Dyella sp. L4-6 - 1l  
WP 015667470.1 - Bradyrhizobium oligotrophicum - 1l  
WP 012813797.1 - Hymenobacter roseosalivarius - 1l  
WP 084445239.1 - Streptomyces avermitilis - 1l  
WP 074837615.1 - Marinovum algicola - 1l  
WP 050532427.1 - Pseudaeuvarivita atlantica - 1l  
546252  
4540271  
5276274  
725765  
329675  
1433717  
1443711  
2271796  
1357026  
1956589  
378390  
3443104  
1300046  
1839010  
976870  
2955610  
1265389  
3679970  
128457  
656230  
777920  
278693  
60072  
43139  
WP 114794724.1 - Gaiella occulta - 1l  
191915  
133614  
159784  
4409918  
550177  
1277420  
2097996  
3039933  
836309  
3524937  
4191291  
3249595  
505222  
3990449  
4530784  
4831762  
152763  
1928862  
1894633  
2860928  
359969  
2409379  
682828  
124105  
2648664  
502560  
73165  
4312154  
WP 081985438.1 - Halopiger salifodinae - 1l  
WP 094527870.1 - Halorubrum sp. Ea8 - 1l  
3397241  
4132420  
1079777  
3608970  
2616337  
182399  
2720739  
1895957  
4241082  
673539  
968502  
WP 080561888.1 - Sulfolobus islandicus - 1l  
2174840  
4019320  
4368404  
4788128  
WP 012934014.1 - Conexibacter woesei - 1h  
196195  
4658272  
3910376  
508165  
5029468  
3853024  
WP 0132225646.1 - Amycolatopsis mediterranei - 1h  
WP 018330638.1 - Actinomycetozoa chiangmaiensis - 1h  
WP 028930304.1 - Pseudonocardia asaccharolytica - 1h  
WP 010988762.1 - Streptomyces avermitilis - 1h  
WP 012890477.1 - Streptosporangium roseum - 1h  
1273803  
2951788  
1707445  
5293719  
313988  
4692069  
5531945  
WP 017611790.1 - Nocardiopsis salina - 1h  
WP 020500148.1 - Scissionella marina - 1h  
WP 005517441.1 - Rhodococcus equi - 1h  
WP 003801347.1 - Rhodrobacter globiformis - 1h  
3561711  
WP 020516695.1 - Actinoplanes globisporus - 1h  
WP 003894103.1 - Mycobacterium smegmatis - 1h  
WP 013806771.1 - Mycolicicoccus subglavus - 1h  
WP 006334825.1 - Gordonia rhizosphaera - 1h  
WP 025349261.1 - Nocardia nova - 1h  
WP 015922819.1 - Thermomicrobium roseum - 1h  
WP 009061231.1 - Methylophilum fumarolicum - 1h  
WP 007904650.1 - Ktedonobacter racemifer - 1h  
WP 007412921.1 - Pseudomonas parvula - 1h  
3189953  
WP 020375837.1 - Sulfolobus thermosulfidooxidans - 1h  
WP 016920676.1 - Methylocystis parvus - 1h  
WP 003612931.1 - Methylosinus trichosporium - 1h  
WP 011153987.1 - Ralstonia eutropha - 1h  
WP 014267363.1 - Granulicella mallensis - 1h  
WP 010587703.1 - Schlesneria paludicola - 1h  
WP 011688202.1 - Solibacter usitatus - 1h  
WP 015247797.1 - Singulisphaera acidiphila - 1h  
WP 028062027.1 - Solirubrobacter soli - 1h  
5337731  
3851471  
4436725  
5313721  
3920554  
270380  
33455  
4245764  
640383  
3668740  
417998  
4244052  
3364106  
84966  
1520499  
1617667  
4457275  
3569417  
513186  
649161  
1187922  
4212715  
3725169  
WP 011603554.1 - Frankia alni - 1h  
WP 014670577.1 - Streptomyces hygroscopicus - 1h  
WP 014376814.1 - Blastococcus saxobidensis - 1h  
WP 020540932.1 - Nonomuraea coxensis - 1h  
WP 012854897.1 - Thermomonospora curvata - 1h  
WP 005443931.1 - Saccharomonospora azurea - 1h  
WP 010696688.1 - Saccharopolyspora spinosa - 1h  
WP 021597135.1 - Actinomadura madurae - 1h  
WP 013132859.1 - Thermobispora bispora - 1h  
WP 008474746.1 - Nitrolancea hollandica - 1h  
WP 012872944.1 - Sphaerobacter thermophilus - 1h  
211949  
3877930  
4816079  
2159606  
4491751  
3395194  
1067363  
4072855  
1649758  
4296861  
298162  
5473629  
1559677  
1051596  
2150936  
404505  
5025552  
4187636  
4872995  
5553274  
4508854  
3814379  
1703716  
5509440  
900875  
4086005  
4687571  
WP 011752262.1 - Thermofilum pendens - 1g  
WP 012123507.1 - Ignicoccus hospitalis - 1g  
WP 013337401.1 - Vulcanisaeta distributa - 1g  
WP 011761956.1 - Pyrobaculum islandicum - 1g  
WP 014125970.1 - Thermoproteus tenax - 1g  
WP 015407385.1 - Dehalococcoides mccartyi - 1a  
WP 015614971.1 - Clostridium pasteurianum - 1a  
WP 013755712.1 - Thermodesulfobium narugense - 1a  
WP 015774148.1 - Desulfomicrobium baculatum - 1a  
WP 021760964.1 - Desulfovibrio gigas - 1b  
WP 011139497.1 - Wolinella succinogenes - 1b  
WP 028760177.1 - Shewanella putrefaciens - 1b  
WP 012675744.1 - Persephonella marina - 1b  
1169896  
2710715  
2744532  
2115544  
2878746  
WP 011688559.1 - Solibacter usitatus - 1c  
WP 011525039.1 - Koribacter versatilis - 1c  
972440  
WP 0114119537.1 - Anaeromyxobacter dehalogenans - 1c  
3020289  
WP 013909681.1 - Thermodesulfobium geofontis - 1c  
WP 015403419.1 - Desulfocapsa sulfexigens - 1c  
WP 011187820.1 - Desulfotalea psychrophila - 1c  
WP 013906919.1 - Thermodesulfator indicus - 1c  
WP 013638066.1 - Desulfurobacterium thermolithotrophum - 1c  
WP 013537874.1 - Thermovibrio ammonificans - 1c  
WP 021568771.1 - Escherichia coli - 1c  
WP 028579802.1 - Desulfobolbus marinus - 1c  
WP 011714122.1 - Magnetococcus japonicus - 1c  
WP 027371077.1 - Desulfoterrivibrio magnetotacticus - 1c  
WP 011384056.1 - Magnetospirillum magneticum - 1c  
1381416  
5461390  
WP 014198378.1 - Azospirillum brasilense - 1c  
2968978  
WP 009206448.1 - Sulfuricella denitrificans - 1c  
WP 004378930.1 - Thauera phenylacetica - 1c  
WP 014238024.1 - Azospira oryzae - 1c  
WP 011289692.1 - Dechloromonas aromatica - 1c  
WP 013886108.1 - Flexistipes sinusarabici - 1c  
WP 013010514.1 - Denitrovibrio acetiphilus - 1c  
WP 010941450.1 - Geobacter sulfurreducens - 1c  
WP 012468242.1 - Geobacter lovleyi - 1c  
WP 013450229.1 - Calditerrivibrio nitroreducens - 1f  
WP 013006836.1 - Deferribacter desulfuricans - 1f  
WP 013885838.1 - Flexistipes sinusarabici - 1f  
WP 013011747.1 - Denitrovibrio acetiphilus - 1f  
WP 012470110.1 - Geobacter electrodiphilus - 1f  
WP 028842875.1 - Thermodesulfobium islandicum - 1f  
WP 012546172.1 - Thermodesulfobium yellowstonii - 1f  
WP 025324524.1 - Desferriusoma camini - 1f  
WP 006562194.1 - Oscillochloris trichoides - 1f  
WP 012121625.1 - Roseiflexus castenholzii - 1f  
WP 015898101.1 - Acidobacterium capsulatum - 1f  
1162069  
5352670  
WP 018502767.1 - Frankia sp. BCU110501 - 1f  
WP 012421152.1 - Akkermansia muciniphila - 1f  
WP 005509950.1 - Corynebacterium amycolatum - 1f  
WP 004007712.1 - Mobiluncus curtisii - 1f  
WP 022865058.1 - Varibaculum cambriense - 1f  
WP 007290417.1 - Thermosinus carboxydovorans - 1d  
WP 095386103.1 - Veillonella dispar - 1d  
WP 029541750.1 - Selenomonas ruminantium - 1d  
WP 010880393.1 - Aquifex aeolicus - 1d  
WP 012502532.1 - Chlorobaculum parvum - 1d  
WP 011358178.1 - Pelodictyon luteolum - 1d  
WP 006930451.1 - Caldithrix abyssii - 1d  
WP 003330153.1 - Bacillus azotoformans - 1d  
WP 013876989.1 - Geobacillus thermoglucosidius - 1d  
WP 014794600.1 - Desulfotobacterium dehalogenans - 1d  
WP 014186363.1 - Desulfosporosinus orientis - 1d  
WP 007653239.1 - Parabacteroides goldsteinii - 1d  
WP 012025584.1 - Flavobacterium johnsoniae - 1d  
WP 010880593.1 - Aquifex aeolicus - 1e  
WP 018077111.1 - Thiobacillus denitrificans - 1e  
WP 007191025.1 - Thiocapsa marina - 1e  
WP 002706902.1 - Thiothrix nivea - 1e  
WP 005026843.1 - Bilophila wadsworthii - 1d  
WP 021522685.1 - Escherichia coli - 1d  
WP 009059758.1 - Methylophilum fumarolicum - 1d  
2846639  
2863758  
WP 01153927.1 - Ralstonia eutropha - 1d  
WP 014429772.1 - Rubrivivax gelatinosus - 1d  
WP 011830409.1 - Methylobium petroleiphilum - 1d  
WP 00803479.1 - Methyloversatilis universalis - 1d  
WP 023105852.1 - Pseudomonas aeruginosa - 1d  
WP 029908155.1 - Hydrogenovibrio marinus - 1d  
WP 012114202.1 - Xanthobacter autotrophicus - 1d  
WP 013913761.1 - Oligotropha carboxydovorans - 1d  
WP 014249365.1 - Azospirillum lipoferrum - 1d  
WP 020745479.1 - Alteromonas macleodii - 1d  
WP 021703499.1 - Azotobacter vinelandii - 1d  
WP 008883370.1 - Hyphomicrobium alhagi - 1d  
WP 015597373.1 - Mesorhizobium denitrificans - 1d  
WP 027157817.1 - Methylobacter luteus - 1d  
WP 002720659.1 - Rhodobacter sphaeroides - 1d  
3550819  
WP 011389917.1 - Rhodospirillum rubrum - 1d  
WP 002683184.1 - Beggiatoa alba - 1d  
WP 007190983.1 - Thiocapsa marina - 1d  
WP 017366017.1 - Methylococcus capsulatus - 1d  
WP 026685892.1 - Azovibrio restrictus - 1d  
WP 011289709.1 - Dechloromonas aromatica - 1d  
WP 028135606.1 - Bradyrhizobium japonicum - 1d  
WP 003612200.1 - Methylosinus trichosporium - 1d  
WP 016919626.1 - Methylocystis parvus - 1d  
WP 026790280.1 - Pleiomorphomonas oryzae - 1d  
WP 011156496.1 - Rhodopseudomonas palustris - 1d  
993769  
5208680  
3348926  
5061155  
WP 003612204.1 - Methylosinus trichosporium - 2b  
WP 028135604.1 - Bradyrhizobium japonicum - 2b  
WP 011384345.1 - Magnetospirillum magneticum - 2b  
WP 011153946.1 - Ralstonia eutropha - 2b  
3436130  
WP 005373434.1 - Thermomicrobium album - 2c  
WP 005505415.1 - Grimontia hollisia - 2c  
WP 007019558.1 - Neptuniibacter caesiariensis - 2c  
WP 010880487.1 - Aquifex aeolicus - 2d  
5203800  
5400446  
1712385  
3809716  
WP 006194531.1 - Nodularia spumigena - 2a  
4750591  
WP 012407177.1 - Nostoc punctiforme - 2a  
WP 011321261.1 - Anabaena variabilis - 2a  
**Co-bin9 - Nostocaceae**  
217611  
WP 011612815.1 - Trichodesmium erythraeum - 2a  
WP 007308441.1 - Crocosphaera watsonii - 2a  
WP 012361536.1 - Cyanospora sp. ATCC 51142 - 2a  
WP 012536298.1 - Acidithiobacillus ferrooxidans - 2a  
WP 007015744.1 - Novosphingobium pentaromovorans - 2a  
WP 011536525.1 - Sphingopyxis alaskensis - 2a  
WP 015927130.1 - Methylocella silvestris - 2a  
WP 013896758.1 - Mesorhizobium opportunistum - 2a  
WP 026607801.1 - Methylocapsa acidiphila - 2a  
WP 020176873.1 - Methyloferula stellata - 2a  
WP 026993387.1 - Flectobacillus major - 2a  
WP 012928387.1 - Spirosoma linguale - 2a  
2147030  
WP 015029646.1 - Emticicia oligotrophica - 2a  
WP 028526813.1 - Runella limosa - 2a  
WP 009185102.1 - Cecembia lonarensis - 2a  
WP 013993526.1 - Zobellia galactanivorans - 2a  
WP 012963102.1 - Hydrogenobacter thermophilus - 2a  
WP 021292443.1 - Thermocrinis albus - 2a  
WP 013678342.1 - Pseudonocardia dioxanivorans - 2a  
WP 013133447.1 - Thermobispora bispora - 2a  
WP 003893634.1 - Mycobacterium smegmatis - 2a  
WP 005476263.1 - Streptomyces botrytis - 2a  
WP 006594684.1 - Kineosphaera limosa - 2a  
WP 006335051.1 - Gordonia rhizosphaera - 2a  
WP 011630008.1 - Frankia alni - 2a  
2906440  
WP 012122267.1 - Roseiflexus castenholzii - 2a  
84868  
2636814  
WP 012615778.1 - Chloroflexus aggregans - 2a  
WP 013987182.1 - Sulfolobus acidophilus - 2a  
WP 013076467.1 - Kyrpidia tusciae - 2a  
WP 029421095.1 - Alicyclobacillus terranosporangiidus - 2a  
WP 027417151.1 - Aneuribacillus terranosporangii - 2a  
WP 003250668.1 - Geobacillus thermoglucosidius - 2a  
WP 028986316.1 - Thermicanus aegyptius - 2a
