# Supplementary material for: Hydrogen-Oxidizing Bacteria Are Abundant in Desert Soils and Strongly Stimulated by Hydration
Source: PubMed Central journal article supplement (PMC7677003; doi:10.1128/msystems.01131-20), 2020-11-17
Supplement: mSystems.01131-20-sf006.pdf [file mSystems.01131-20-sf006.pdf]

Bootstrap values

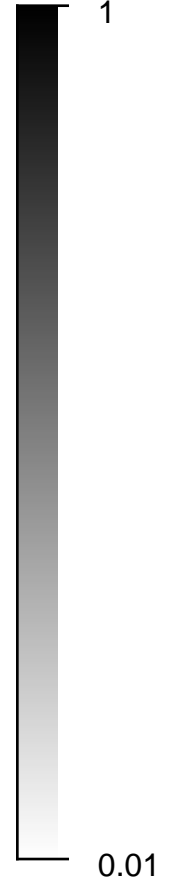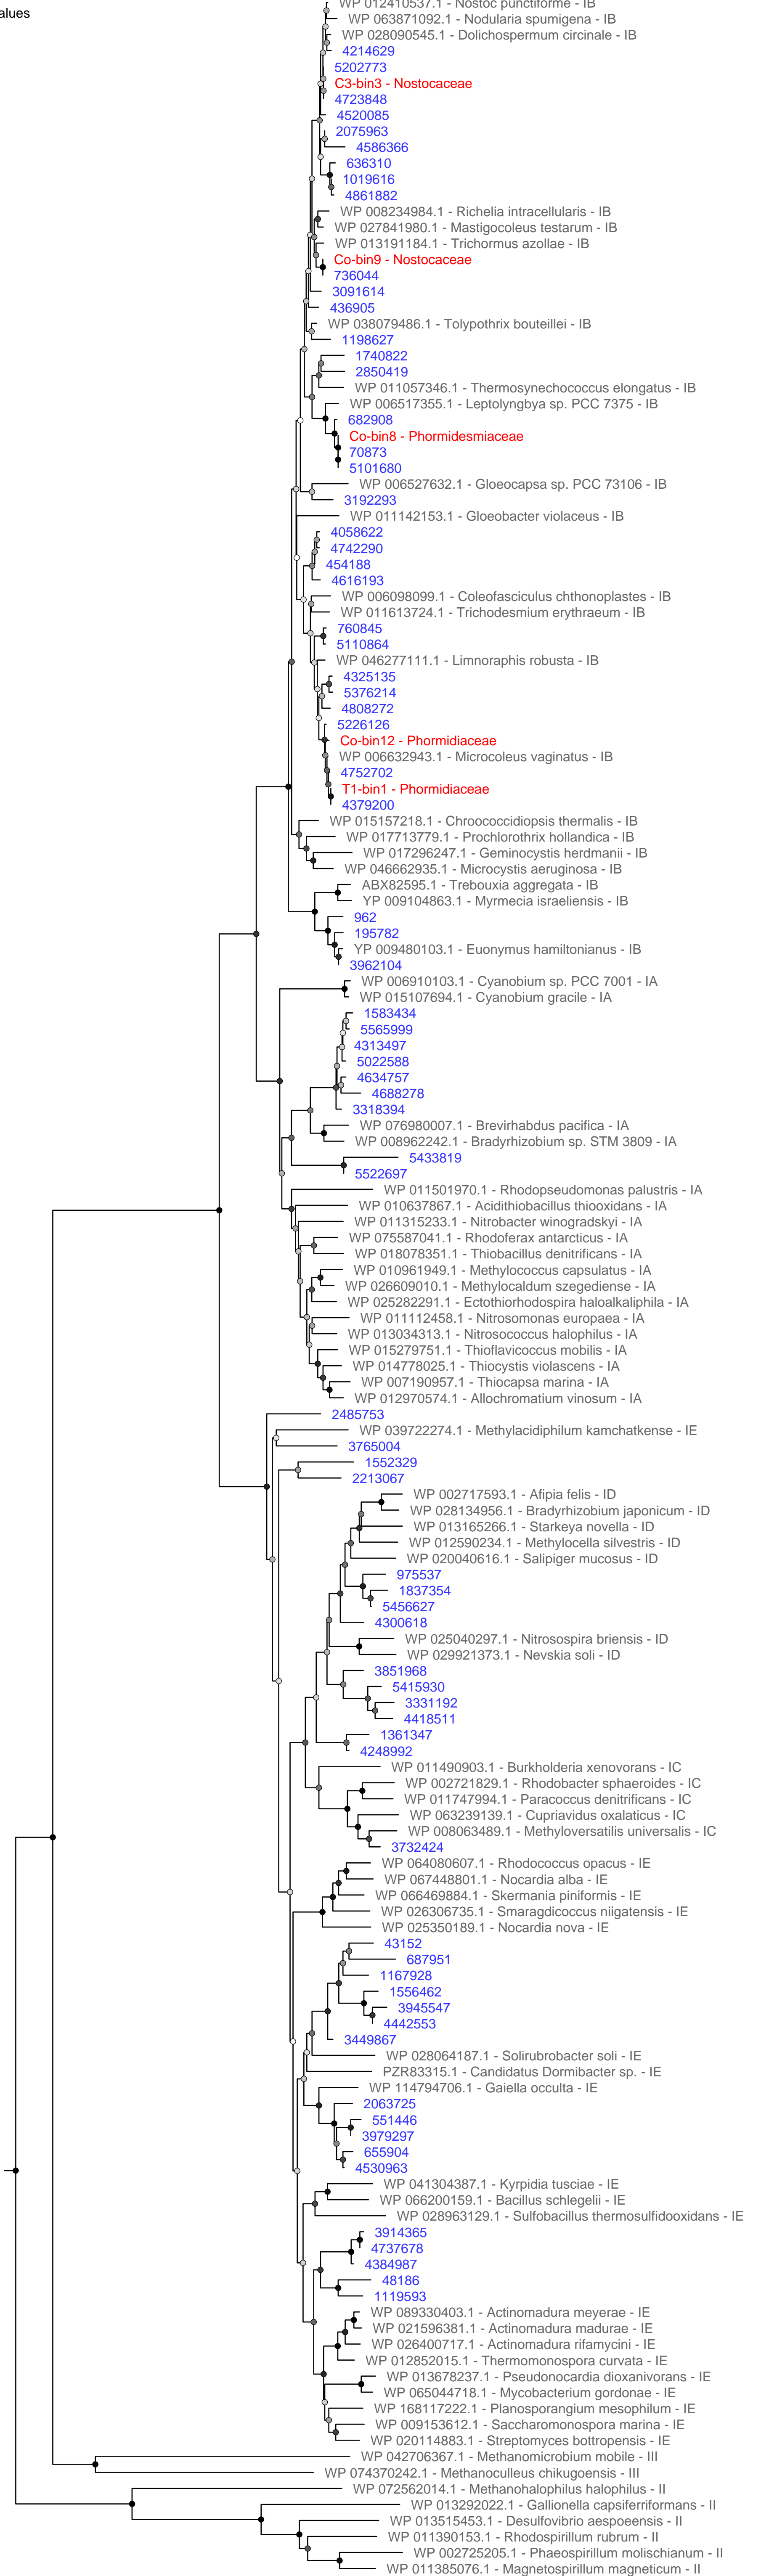

0.1
